# Supplementary material for: Functional organization of box C/D RNA-guided RNA methyltransferase
Source: PubMed Central journal article supplement — Nucleic Acids Res. 2020 Apr 16;48(9):5094–105. doi: 10.1093/nar/gkaa247 (PMC7229835; doi:10.1093/nar/gkaa247), 2020-04-16
Supplement: gkaa247_supplemental_file.pdf [file gkaa247_supplemental_file.pdf]

Supplementary Figures S1-S2

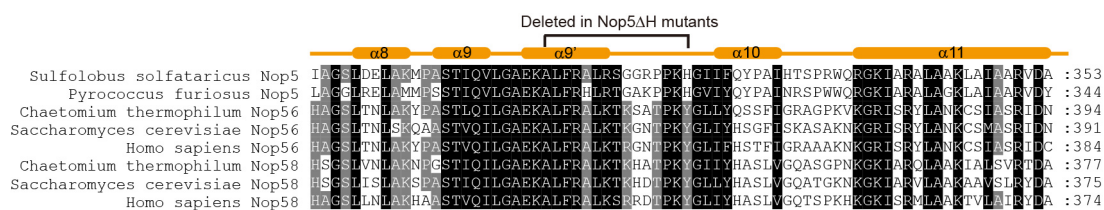

Figure S1. Multiple sequence alignment of Nop5 homologs. The sequences deleted in the Nop5 $\Delta$ H mutant are shown on the top. The residues with 100% and 80% similarity are shaded in black and grey, respectively.

A

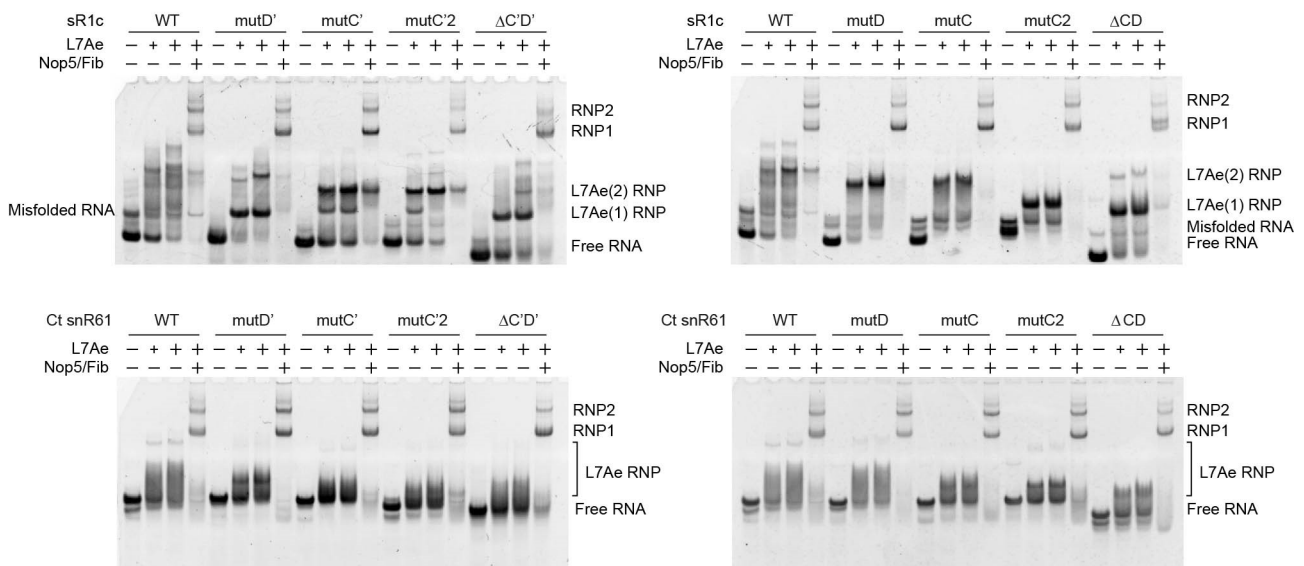

B

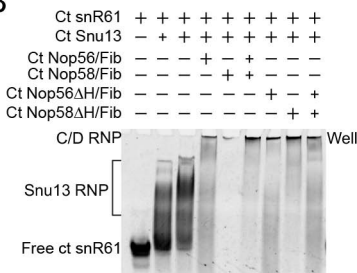

Figure S2. Electrophoretic mobility shift assay of C/D RNP.

(A) Ss C/D RNP. Each C/D RNA (1  $\mu$ M) was assembled with L7Ae (2 and 3  $\mu$ M) alone or with L7Ae (3  $\mu$ M) and Nop5/Fib (2  $\mu$ M). RNA was resolved in native gels and stained by SYBR GOLD. RNP1 and RNP2 refer to the monomeric and dimeric forms of C/D RNP, respectively. The RNPs assembled with mutant RNAs may contain reduced copies of L7Ae. L7Ae alone binds poorly with snR61 and its mutants. L7Ae assembles with sR1c and its mutants into multiple species. The major species containing one and two copies of L7Ae are labeled; the other species may result from non-specific binding. The free state and L7Ae complex of sR1c mutC2 RNA migrate aberrantly for unknown reason. Many RNAs contain misfolded species that migrate slower and bind poorly with L7Ae. (B) Ct C/D RNP. Ct snR61 (2  $\mu$ M) was assembled with Snu13 (4 or 6  $\mu$ M) and Nop5X/Fib complex (2 or 4  $\mu$ M). The large- and small-sized plus signs denote high and low concentrations, respectively.
